# Supplementary material
Source: publisher figshare collection journal article supplement (https://diabetesjournals.figshare.com/articles/dataset/_/14489001)
Supplement: Supplementary file 1 [file 1]

**Supplementary Table 1. Trends in prevalence of DKA at type 1 diabetes diagnosis by age in the SEARCH for Diabetes in Youth study (2010-2016)**

|                  | 0-4 years |                          |             | 5-9 years |                          |             | 10-14 years |                          |             | ≥15 years |                          |             |
|------------------|-----------|--------------------------|-------------|-----------|--------------------------|-------------|-------------|--------------------------|-------------|-----------|--------------------------|-------------|
| Incident year(s) | N         | Prevalence per 100 cases | 95% CI      | N         | Prevalence per 100 cases | 95% CI      | N           | Prevalence per 100 cases | 95% CI      | N         | Prevalence per 100 cases | 95% CI      |
| 2010-2016**      | 555       | 46.68                    | 43.84-49.51 | 904       | 37.67                    | 35.73-39.61 | 1114        | 39.45                    | 37.64-41.25 | 356       | 29.72                    | 27.13-32.30 |
| 2010             | 72        | 44.72                    | 37.04-52.40 | 102       | 33.89                    | 28.54-39.23 | 111         | 35.46                    | 30.16-40.76 | 39        | 27.46                    | 20.12-34.81 |
| 2011             | 80        | 45.71                    | 38.33-53.10 | 131       | 37.54                    | 32.46-42.62 | 149         | 36.97                    | 32.26-41.69 | 39        | 24.68                    | 17.96-31.41 |
| 2012             | 71        | 42.77                    | 35.24-50.30 | 141       | 41.59                    | 36.35-46.84 | 160         | 40.61                    | 35.76-45.46 | 51        | 30.54                    | 23.55-37.52 |
| 2013             | 77        | 42.78                    | 35.55-50.01 | 109       | 33.75                    | 28.59-38.90 | 155         | 36.13                    | 31.58-40.68 | 56        | 31.64                    | 24.79-38.49 |
| 2014             | 92        | 52.57                    | 45.17-59.97 | 132       | 39.64                    | 34.39-44.89 | 178         | 41.59                    | 36.92-46.26 | 56        | 30.43                    | 23.79-37.08 |
| 2015             | 82        | 47.95                    | 40.47-55.44 | 126       | 35.39                    | 30.43-40.36 | 178         | 41.98                    | 37.28-46.68 | 56        | 33.94                    | 26.71-41.16 |
| 2016             | 81        | 50.31                    | 42.59-58.03 | 163       | 40.85                    | 36.03-45.68 | 183         | 42.26                    | 37.61-46.92 | 59        | 28.78                    | 22.58-34.98 |
| P trend*         |           | 0.1808                   |             |           | 0.4152                   |             |             | 0.0543                   |             |           | 0.1951                   |             |

\* P-value for trend is generated by creating 4 equal time-periods

\*\*n=1490 with missing data on age at diagnosis for the period 2010-2016

**Supplementary Table 2. Trends in prevalence of DKA at type 1 diabetes diagnosis by sex in the SEARCH for Diabetes in Youth study (2010-2016)**

|                  | Female |                          |             | Male |                          |             |
|------------------|--------|--------------------------|-------------|------|--------------------------|-------------|
| Incident year(s) | N      | Prevalence per 100 cases | 95% CI      | N    | Prevalence per 100 cases | 95% CI      |
| 2010-2016**      | 1335   | 38.22                    | 36.61-39.83 | 1594 | 38.70                    | 37.21-40.19 |
| 2010             | 146    | 33.64                    | 29.20-38.09 | 178  | 36.85                    | 32.55-41.16 |
| 2011             | 192    | 38.02                    | 33.79-42.25 | 207  | 35.63                    | 31.73-39.52 |
| 2012             | 186    | 40.09                    | 35.63-44.55 | 237  | 39.37                    | 35.47-43.27 |
| 2013             | 190    | 35.38                    | 31.34-39.43 | 207  | 36.19                    | 32.25-40.13 |
| 2014             | 204    | 40.24                    | 35.97-44.51 | 254  | 41.44                    | 37.54-45.34 |
| 2015             | 191    | 38.66                    | 34.37-42.96 | 251  | 40.35                    | 36.50-44.21 |
| 2016             | 226    | 40.94                    | 36.84-45.04 | 260  | 40.25                    | 36.47-44.03 |
| P trend*         |        | 0.1090                   |             |      | 0.0477                   |             |

\* P-value for trend is generated by creating 4 equal time-periods

\*\*n=1491 with missing data on sex for the period 2010-2016

**Supplementary Table 3. Trends in prevalence of DKA at type 1 diabetes diagnosis by race and ethnicity in the SEARCH for Diabetes in Youth study (2010-2016)**

|                  | Non-Hispanic White |                          |             | Hispanic |                          |             | African American |                          |             | Other** |                          |             |
|------------------|--------------------|--------------------------|-------------|----------|--------------------------|-------------|------------------|--------------------------|-------------|---------|--------------------------|-------------|
| Incident year(s) | N                  | Prevalence per 100 cases | 95% CI      | N        | Prevalence per 100 cases | 95% CI      | N                | Prevalence per 100 cases | 95% CI      | N       | Prevalence per 100 cases | 95% CI      |
| 2010-2016**      | 1828               | 36.85                    | 35.51-38.19 | 545      | 43.57                    | 40.82-46.31 | 411              | 39.79                    | 36.80-42.77 | 141     | 39.72                    | 34.63-44.81 |
| 2010             | 216                | 34.89                    | 31.14-38.65 | 57       | 38.51                    | 30.67-46.35 | 33               | 30.00                    | 21.44-38.56 | 17      | 47.22                    | 30.91-63.53 |
| 2011             | 262                | 36.19                    | 32.69-39.69 | 70       | 42.42                    | 34.88-49.97 | 52               | 36.88                    | 28.92-44.84 | 14      | 26.92                    | 14.87-38.98 |
| 2012             | 264                | 36.77                    | 33.24-40.30 | 73       | 48.67                    | 40.67-56.67 | 60               | 42.86                    | 34.66-51.05 | 26      | 44.83                    | 32.03-57.63 |
| 2013             | 246                | 34.31                    | 30.83-37.78 | 77       | 40.74                    | 33.74-47.75 | 55               | 35.26                    | 27.76-42.75 | 19      | 42.22                    | 27.79-56.65 |
| 2014             | 293                | 39.33                    | 35.82-42.84 | 76       | 42.70                    | 35.43-49.96 | 66               | 45.21                    | 37.13-53.28 | 22      | 44.00                    | 30.24-57.76 |
| 2015             | 256                | 36.21                    | 32.67-39.75 | 91       | 47.15                    | 40.11-54.19 | 78               | 47.56                    | 39.92-55.20 | 16      | 31.37                    | 18.64-44.11 |
| 2016             | 291                | 39.81                    | 36.26-43.36 | 101      | 44.30                    | 37.85-50.75 | 67               | 38.07                    | 30.89-45.24 | 27      | 42.86                    | 30.64-55.08 |
| P trend*         |                    | 0.1120                   |             |          | 0.2855                   |             |                  | 0.1641                   |             |         | 0.5269                   |             |

\* P-value for trend is generated by creating 4 equal time-periods; Includes Asian/Pacific Islander, American Indian, other racial groups

\*\*n=1479 with missing data on race/ethnicity for the period 2010-2016

**Supplementary Table 4. Trends in prevalence of DKA at type 1 diabetes diagnosis by insurance status in the SEARCH for Diabetes in Youth study (2010-2016)**

|                  | Private |                          |             | Medicaid/Medicare/<br>Other/None |                          |             |
|------------------|---------|--------------------------|-------------|----------------------------------|--------------------------|-------------|
| Incident year(s) | N       | Prevalence per 100 cases | 95% CI      | N                                | Prevalence per 100 cases | 95% CI      |
| 2010-2016**      | 1462    | 34.76                    | 33.32-36.20 | 1061                             | 44.21                    | 42.22-46.20 |
| 2010             | 159     | 31.93                    | 27.83-36.02 | 101                              | 42.80                    | 36.48-49.11 |
| 2011             | 209     | 34.66                    | 30.86-38.46 | 138                              | 41.44                    | 36.15-46.73 |
| 2012             | 216     | 35.01                    | 31.24-38.77 | 158                              | 45.93                    | 40.66-51.20 |
| 2013             | 197     | 31.67                    | 28.02-35.33 | 148                              | 40.22                    | 35.21-45.23 |
| 2014             | 230     | 38.21                    | 34.32-42.09 | 167                              | 45.14                    | 40.06-50.21 |
| 2015             | 203     | 34.06                    | 30.26-37.87 | 159                              | 45.95                    | 40.70-51.20 |
| 2016             | 248     | 37.13                    | 33.46-40.79 | 190                              | 47.15                    | 42.27-52.02 |
| P trend*         |         | 0.0885                   |             |                                  | 0.3512                   |             |

\* P-value for trend is generated by creating 4 equal time-periods

\*\*n=1,006 with missing data on insurance status at diagnosis for the period 2010-2016

**Supplementary Table 5. Trends in prevalence of DKA at type 1 diabetes diagnosis by season in the SEARCH for Diabetes in Youth study (2010-2016)**

|                  | Summer |                          |             | Fall |                          |             | Winter |                          |             | Spring |                          |             |
|------------------|--------|--------------------------|-------------|------|--------------------------|-------------|--------|--------------------------|-------------|--------|--------------------------|-------------|
| Incident year(s) | N      | Prevalence per 100 cases | 95% CI      | N    | Prevalence per 100 cases | 95% CI      | N      | Prevalence per 100 cases | 95% CI      | N      | Prevalence per 100 cases | 95% CI      |
| 2010-2016**      | 673    | 38.48                    | 36.20-40.76 | 692  | 38.88                    | 36.61-41.14 | 824    | 39.02                    | 36.93-41.10 | 740    | 37.54                    | 35.41-39.68 |
| 2010             | 72     | 35.64                    | 29.04-42.25 | 83   | 36.73                    | 30.44-43.01 | 96     | 37.50                    | 31.57-43.43 | 73     | 31.33                    | 25.37-37.29 |
| 2011             | 107    | 40.07                    | 34.20-45.95 | 85   | 33.07                    | 27.32-38.83 | 111    | 38.95                    | 33.29-44.61 | 96     | 34.66                    | 29.05-40.26 |
| 2012             | 87     | 35.80                    | 29.77-41.83 | 93   | 40.97                    | 34.57-47.37 | 128    | 40.38                    | 34.98-45.78 | 115    | 41.22                    | 35.44-46.99 |
| 2013             | 95     | 37.70                    | 31.71-43.68 | 103  | 39.62                    | 33.67-45.56 | 109    | 34.49                    | 29.25-39.73 | 90     | 32.03                    | 26.57-37.48 |
| 2014             | 107    | 39.63                    | 33.80-45.46 | 112  | 43.41                    | 37.36-49.46 | 127    | 44.25                    | 38.50-50.00 | 112    | 36.72                    | 31.31-42.13 |
| 2015             | 94     | 36.02                    | 30.19-41.84 | 106  | 40.15                    | 34.24-46.06 | 117    | 37.86                    | 32.46-43.27 | 125    | 44.33                    | 38.53-50.12 |
| 2016             | 111    | 43.70                    | 37.60-49.80 | 110  | 38.19                    | 32.58-43.81 | 136    | 39.77                    | 34.58-44.95 | 129    | 41.08                    | 35.64-46.52 |
| P trend*         |        | 0.4912                   |             |      | 0.2852                   |             |        | 0.4984                   |             |        | 0.0102                   |             |

\* P-value for trend is generated by creating 4 equal time-periods

\*\*n=1491 with missing data on season for the period 2010-2016

**Supplementary Table 6. Trends in prevalence of DKA at type 1 diabetes diagnosis by clinical site in the SEARCH for Diabetes in Youth study (2010-2016)**

|                  | SC  |                          |             | OH  |                          |             | CO   |                          |             | CA  |                          |             | WA  |                          |             |
|------------------|-----|--------------------------|-------------|-----|--------------------------|-------------|------|--------------------------|-------------|-----|--------------------------|-------------|-----|--------------------------|-------------|
| Incident year(s) | N   | Prevalence per 100 cases | 95% CI      | N   | Prevalence per 100 cases | 95% CI      | N    | Prevalence per 100 cases | 95% CI      | N   | Prevalence per 100 cases | 95% CI      | N   | Prevalence per 100 cases | 95% CI      |
| 2010-2016**      | 500 | 31.49                    | 29.20-33.77 | 325 | 33.78                    | 30.79-36.77 | 1078 | 44.66                    | 42.67-46.64 | 406 | 39.42                    | 36.43-42.40 | 620 | 38.32                    | 35.95-40.69 |
| 2010             | 54  | 25.59                    | 19.70-31.48 | 39  | 27.86                    | 20.43-35.28 | 115  | 44.75                    | 38.67-50.83 | 60  | 46.51                    | 37.90-55.12 | 56  | 31.11                    | 24.35-37.87 |
| 2011             | 60  | 26.79                    | 20.99-32.59 | 48  | 34.04                    | 26.22-41.86 | 143  | 42.18                    | 36.93-47.44 | 48  | 35.82                    | 27.70-43.94 | 100 | 40.32                    | 34.22-46.43 |
| 2012             | 79  | 37.09                    | 30.60-43.58 | 46  | 34.07                    | 26.08-42.07 | 157  | 46.31                    | 41.00-51.62 | 55  | 39.57                    | 31.44-47.70 | 86  | 35.83                    | 29.77-41.90 |
| 2013             | 69  | 29.61                    | 23.75-35.48 | 49  | 35.00                    | 27.10-42.90 | 135  | 38.57                    | 33.47-43.67 | 61  | 37.65                    | 30.19-45.12 | 83  | 37.05                    | 30.73-43.38 |
| 2014             | 77  | 32.49                    | 26.53-38.45 | 46  | 33.82                    | 25.87-41.78 | 161  | 47.63                    | 42.31-52.96 | 63  | 42.86                    | 34.86-50.86 | 111 | 42.37                    | 36.38-48.35 |
| 2015             | 82  | 36.28                    | 30.01-42.55 | 51  | 38.64                    | 30.33-46.94 | 166  | 42.78                    | 37.86-47.71 | 65  | 43.33                    | 35.40-51.26 | 78  | 35.45                    | 29.13-41.78 |
| 2016             | 79  | 32.38                    | 26.51-38.25 | 46  | 33.33                    | 25.47-41.20 | 201  | 49.88                    | 44.99-54.76 | 54  | 31.95                    | 24.92-38.98 | 106 | 43.44                    | 37.22-49.66 |
| P trend*         |     | 0.0478                   |             |     | 0.2338                   |             |      | 0.2621                   |             |     | 0.6913                   |             |     | 0.2200                   |             |

\* P-value for trend is generated by creating 4 equal time-periods

\*\*n=1491 with missing data on search site for the period 2010-2016

**Supplementary Table 7. Demographic characteristics of registered cases\* according to missing covariate data for complete case analysis**

\*Excludes n=131 with missing documentation of DKA status

| Characteristic           | Excluded |            | Included |             |
|--------------------------|----------|------------|----------|-------------|
|                          | N        | Count (%)  | N        | Count (%)   |
| Age at diagnosis (years) | 1490     |            | 6121     |             |
| 0-4                      |          | 191 (12.8) |          | 998 (16.3)  |
| 5-9                      |          | 432 (29.0) |          | 1968 (32.2) |
| 10-14                    |          | 571 (38.3) |          | 2253 (36.8) |
| ≥15                      |          | 296 (19.9) |          | 902 (14.7)  |
| Sex                      | 1491     |            | 6121     |             |
| Female                   |          | 681 (45.7) |          | 2812 (45.9) |
| Male                     |          | 810 (54.3) |          | 3309 (54.1) |
| Race/ethnicity           | 1479     |            | 6121     |             |
| NHW                      |          | 890 (60.2) |          | 4071 (66.5) |
| Other                    |          | 589 (39.8) |          | 2050 (33.5) |
| SEARCH site              | 1491     |            | 6121     |             |
| South Carolina           |          | 322 (21.6) |          | 1266 (20.7) |
| Ohio                     |          | 161 (10.8) |          | 801 (13.1)  |
| Colorado                 |          | 316 (21.2) |          | 2098 (34.3) |
| California               |          | 301 (20.2) |          | 729 (11.9)  |
| Washington               |          | 391 (26.2) |          | 1227 (20.0) |
